# Supplementary material
Source: publisher figshare collection journal article supplement (https://acs.figshare.com/ndownloader/files/13879154)
Supplement: Supplementary file 1 [file 13879154]

## Supporting Information

### Toluene Methylation by Methyl Mercaptan and Methanol over Zeolites – A Comparative Study

Claudia Cammarano, Elodie Gay, Annie Finiels, François Fajula and Vasile Hulea\*

*Institut Charles Gerhardt Montpellier, UMR 5253, CNRS-UM-ENSCM, Matériaux Avancés pour la Catalyse et la Santé, 240 avenue du Professeur Emile Jeanbrau, CS 60297, 34296 Montpellier Cedex 5, France*

\*Corresponding author : \*E-mail: vasile.hulea@enscm.fr

#### *Catalyst*

NH<sub>4</sub>-ZSM5-15 (CBV 3024E) was purchased by Zeolyst International. Prior to reaction, the catalysts were calcined in reactor at 550 °C for 8 h, and thus NH<sub>4</sub>-ZSM5-15 was transformed into HZSM5-15 catalyst.

#### *Catalyst characterisation*

N<sub>2</sub> isotherms used to determine the apparent surface area (BET approach) were obtained by N<sub>2</sub> sorption. The experiments were conducted at - 196 °C using a Micromeritics ASAP 2010 sorptometer. Before experiments, the samples were desorbed under vacuum at 300 °C for 8 h.

The number of acid sites was evaluated by temperature programmed desorption (TPD) of ammonia using a Micromeritics AUTOCHEM 2910 apparatus. The sample (around 0.1 g) was first heated at 600 °C in air flow for 6 h. Then it was saturated with NH<sub>3</sub> by flowing a 5% (v) NH<sub>3</sub>/He mixture at 100 °C during 30 min. After that, the sample was purged for 2 h in a He flow to eliminate loosely bonded NH<sub>3</sub>. Finally it was heated at a constant temperature ramp-up of 10 K min<sup>-1</sup> up between 175 and 600 °C in He flow (30 ml min<sup>-1</sup>). The NH<sub>3</sub> concentration evolving from the sample during the last heating step was continuously measured by a thermal conductivity detector (TCD).

#### *Catalytic activity measurements*

The reaction between toluene and CH<sub>3</sub>SH (or CH<sub>3</sub>OH) has been carried out in a fixed bed flow microreactor (i.d. = 4 mm) with 100 mg of HZSM-5 catalyst (grain size of 150-250 µm), in a continuous nitrogen flow (30 mLmin<sup>-1</sup>) and atmospheric pressure. Each catalytic test (duration of 4h) has been performed at a constant temperature (250, 350, 450 or 550 °C) with a fresh catalyst sample using a T/CH<sub>3</sub>SH(CH<sub>3</sub>OH) molar ratio of 1/1. The toluene weight hourly space velocity (WHSV) was 4 h<sup>-1</sup>. Catalyst performance was measured at 120 min after feeding of the reactants started. The products were analyzed online by gas chromatography (Shimadzu, GC 2014) using an auto-sampling valve. The GC was connected to a dual detector device, flame ionization detector (FID) and flame photometric detector (FPD). Calibration curves were obtained using pure compounds or mixture with known concentrations.

**Table S1.** Composition of the aromatic fraction

| Reagents               | T (°C) | Aromatics (mol%) <sup>a</sup> |      |      |      |
|------------------------|--------|-------------------------------|------|------|------|
|                        |        | T                             | B    | X    | TMB  |
| T + CH <sub>3</sub> SH | 250    | 98.0                          | 0    | 1.8  | 0.2  |
|                        | 350    | 79.0                          | 1.2  | 14.9 | 4.9  |
|                        | 450    | 31.5                          | 1.2  | 55.3 | 12.0 |
|                        | 550    | 52.6                          | 13.1 | 32.2 | 2.1  |
| T + CH <sub>3</sub> OH | 250    | 89.5                          | 0    | 9.2  | 1.3  |
|                        | 350    | 56.9                          | 2.1  | 37.5 | 3.5  |
|                        | 450    | 55.9                          | 4.6  | 34.6 | 3.9  |
|                        | 550    | 49.5                          | 14.9 | 31.1 | 4.5  |

<sup>a</sup> T = toluene, B = benzene, X = xylene, TMB = tri-methylbenzenes

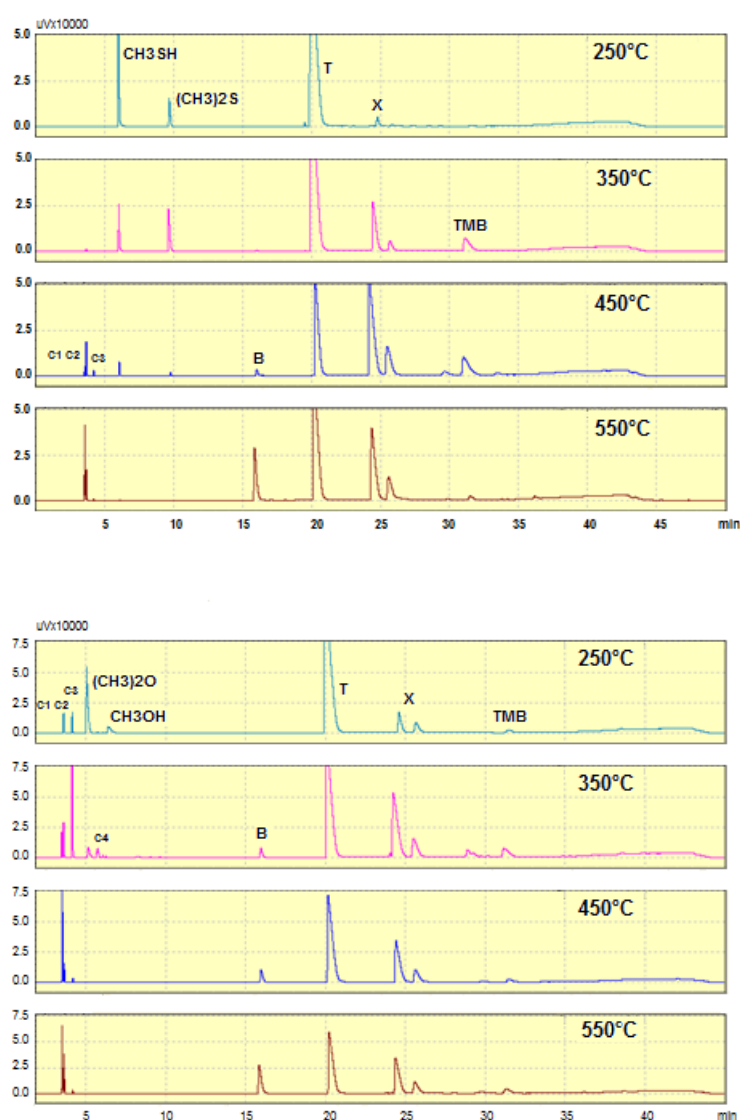

**Figure S1.** GC-FID chromatograms for the reaction T + CH<sub>3</sub>SH (up) and T + CH<sub>3</sub>OH (bottom) at various temperatures, after 120 min on stream. Reaction conditions: weight of catalyst = 100 mg; nitrogen flow = 30 mLmin<sup>-1</sup>; WHSV (toluene) = 4 h<sup>-1</sup>.

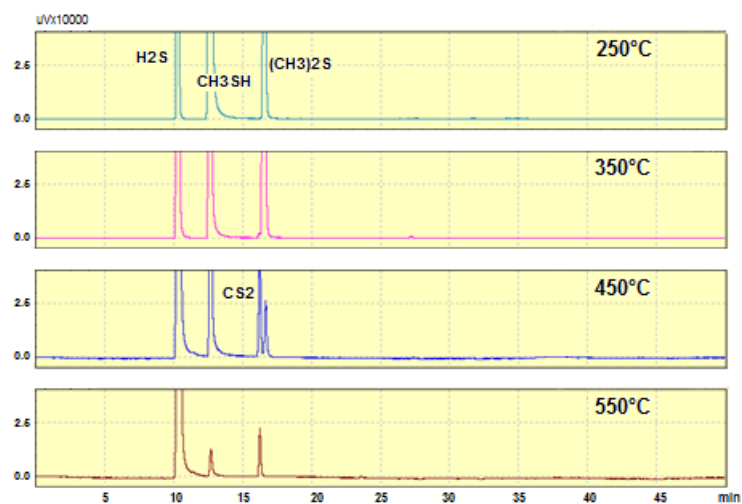

**Figure S2.** GC-FPD chromatograms for the reaction T + CH<sub>3</sub>SH at various temperatures, after 120 min on stream. Reaction conditions: weight of catalyst = 100 mg; nitrogen flow = 30 mLmin<sup>-1</sup>; WHSV (toluene) = 4 h<sup>-1</sup>
